# Supplementary material
Source: PubMed Central journal article supplement (PMC3521515)
Supplement: NIHMS423375-supplement-01.pdf [file NIHMS423375-supplement-01.pdf]

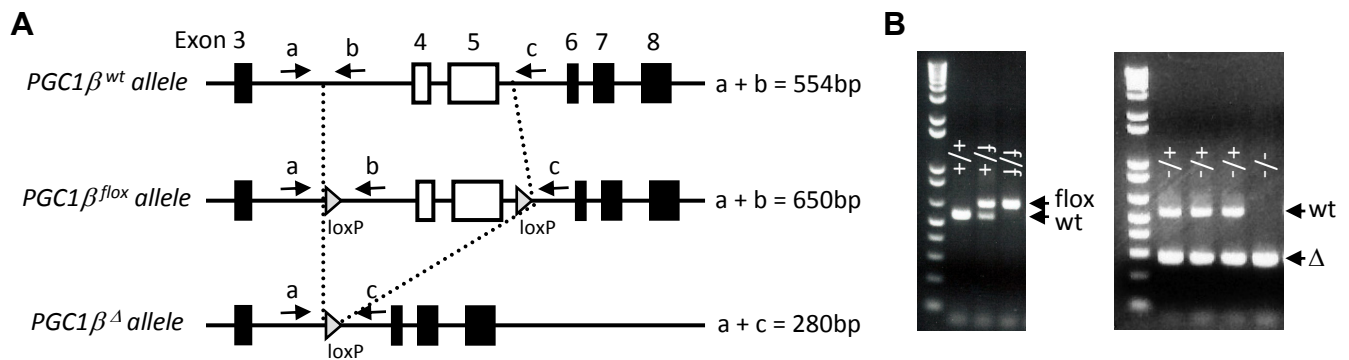

### Figure S1. PGC1 $\beta$ flox Mice

(A) A schematic diagram illustrating the design of PGC1 $\beta$  flox mice and genotyping strategy. In the PGC1 $\beta$ flox allele, exon 4 and 5 were flanked by loxP recombination sites<sup>44</sup> and were deleted in cells that expressed the Cre recombinase, resulting in the conversion of the PGC1 $\beta$ flox allele to a PGC1 $\beta$  null allele (PGC1 $\beta$  $\Delta$ ).

(B) A multiplex PCR strategy to determine the genotype at the PGC1 $\beta$  locus in mice: f indicates flox allele; + indicates wt allele; - indicates null allele ( $\Delta$ ).

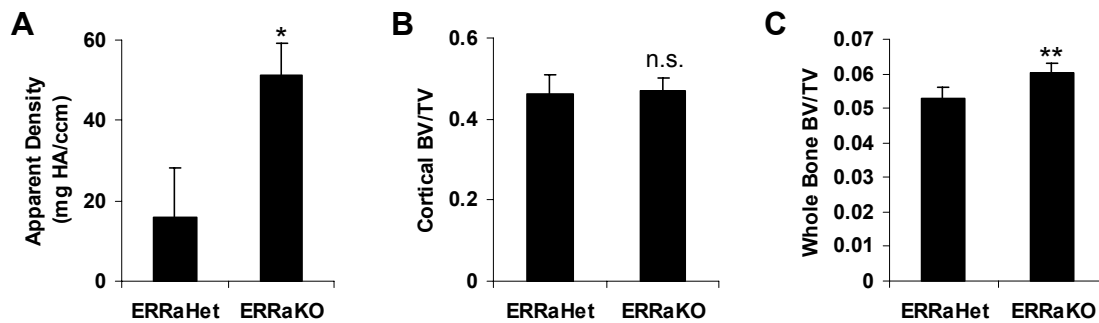

**Figure S2. MicroCT Analysis of the Tibiae From ERRα KO Mice**

Tibiae were collected from ERRαKOs or littermate ERRαHet controls (10-12 month old, male, n=4), scanned by  $\mu$ CT35 for both overall assessment (at 14 micron resolution) and the structural analysis of trabecular and cortical bone (at 7 micron resolution).

(A) The apparent density of the trabecular bone was increased in the ERRαKOs, confirming the greater trabecular BV/TV in these mice.

(B) The BV/TV of the cortical bone was not significantly altered.

(C) The BV/TV of the entire tibia was significantly increased in the ERRαKOs, confirming an overall greater bone volume. Statistical significance is designated as \*, p<0.05; \*\*, p<0.01; n.s., non-significant (p>0.05) .

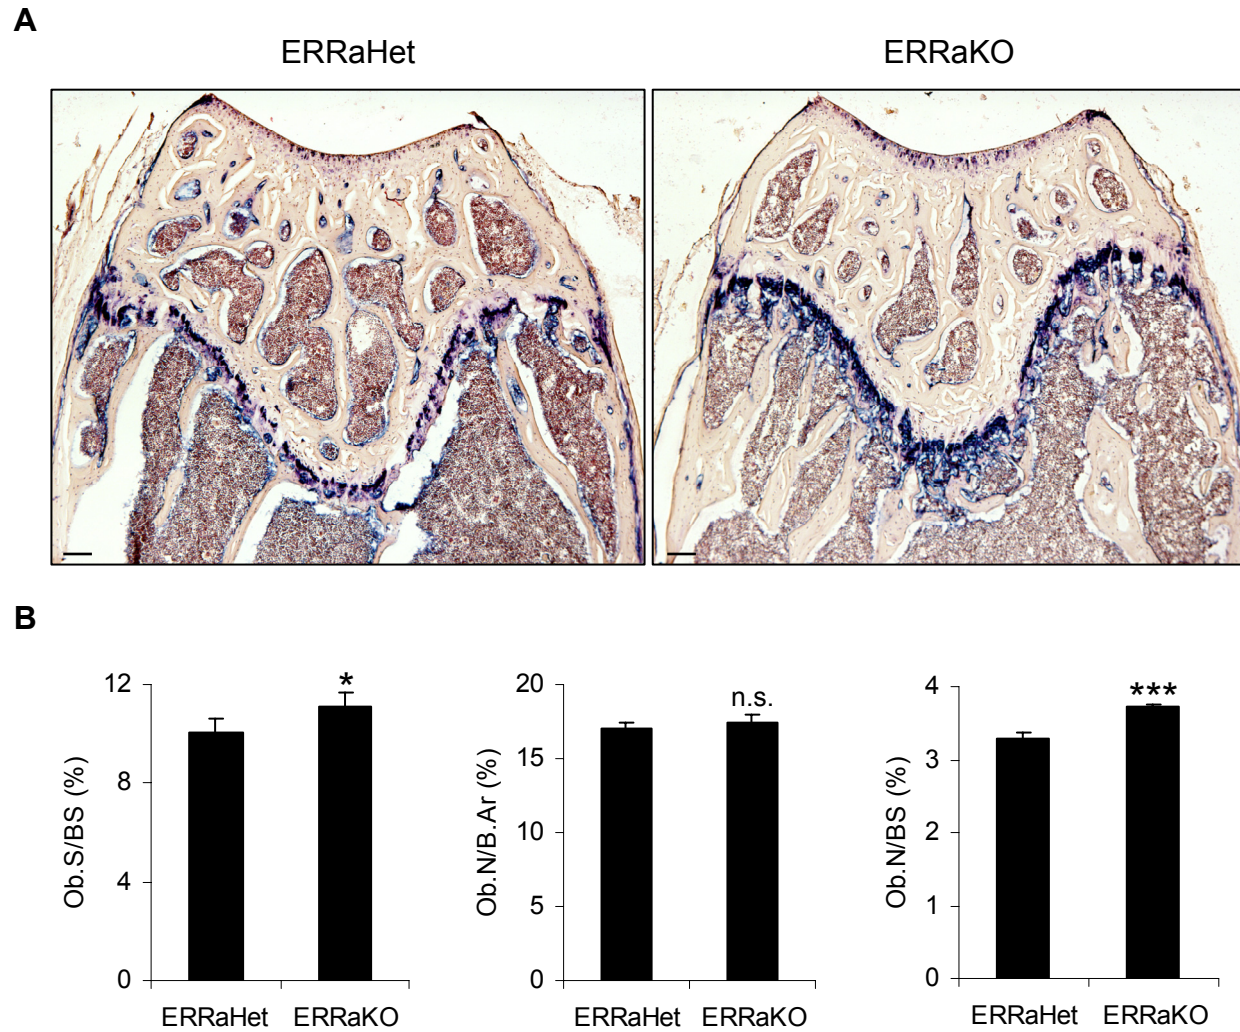

**Figure S3.  $ERR\alpha$  Deletion Resulted in Increased Osteoblast Surface and Number**

Histomorphometric analysis of  $ERR\alpha$  KO mice and littermate  $ERR\alpha$  Het control mice (n=4, 10-12 months old, male).

(A) Representative images of alkaline phosphatase (ALP)-stained femoral sections. Osteoblasts were identified as blue cells at bone and marrow boundary. Scale bar, 100 $\mu$ m.

(B) Quantification of osteoblast surface (Ob.S/BS) and osteoblast number (Ob.N/B.Ar and Ob.N/BS). BS, bone surface; B.Ar, bone area. Statistical significance is designated as \*,  $p < 0.05$ ; \*\*\*,  $p < 0.005$ ; n.s., non-significant ( $p > 0.05$ ).

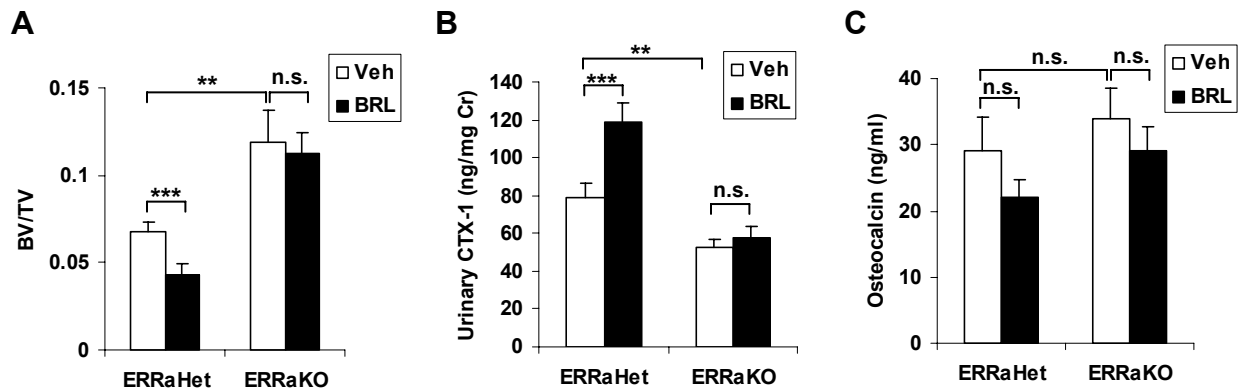

**Figure S4. Rosiglitazone-induced bone loss was severely diminished in ERR $\alpha$  KO mice.**

ERR $\alpha$ KO mice and ERR $\alpha$ Het controls (9-month-old, male) were treated with BRL (10mg/kg/day) or vehicle daily by oral gavage for 8 weeks (n=3). Statistical significance is designated as \*, p<0.05; \*\*, p<0.01; \*\*\*, p<0.005; n.s., non-significant (p>0.05).

(A) Trabecular BV/TV (bone volume/tissue volume ratio).

(B) Urinary concentration of a bone resorption marker CTX-1 (normalized to urinary creatinine concentration).

(C) Serum concentration of a bone formation marker osteocalcin.

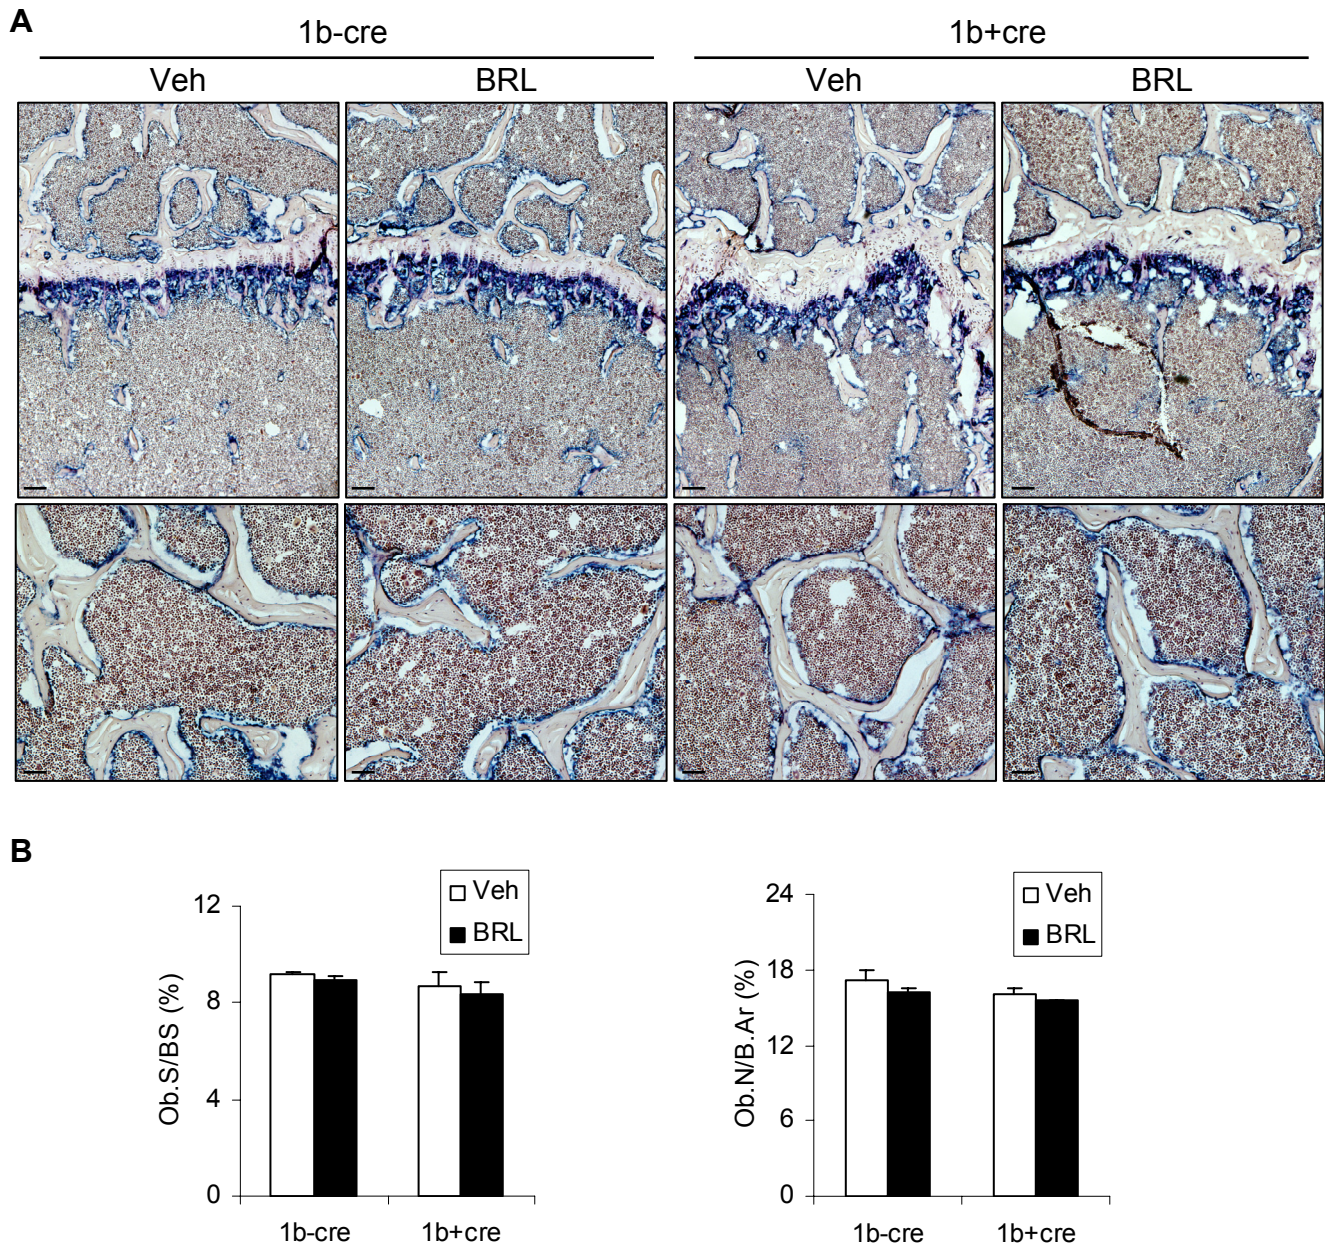

**Figure S5. Osteoclastic PGC1 $\beta$  Deletion Did Not Significantly Alter Osteoblast Number or Surface** PGC1 $\beta$ /fTie2cre mutant mice (1b+cre) and PGC1 $\beta$ /f littermate control mice (1b-cre) (8-month-old, male) were treated with BRL at 10mg/kg/day or vehicle daily by oral gavage for 8 weeks (n=4 or 5 in each group).

(A) Representative images of alkaline phosphatase (ALP)-stained femoral sections. Osteoblasts were identified as the blue cells at the bone and marrow boundary. Top, lower magnification (4x, scale bar, 100 $\mu$ m); bottom, higher magnification (10x, scale bar, 40 $\mu$ m).

(B) Quantification of osteoblast surface (Ob.S/BS) and osteoblast number (Ob.N/B.Ar). BS, bone surface; B.Ar, bone area. All differences were statistically non-significant ( $p > 0.05$ ).
